# Supplementary material for: Cytokine antibody array-based analysis of IL-37 treatment effects in asthma
Source: publisher site journal article supplement (doi:10.18632/aging.203515), 2021-09-13
Supplement: Supplementary file [file aging-v13i17-203515-supplementary-material-SD1.pdf]

SUPPLEMENTARY FIGURE

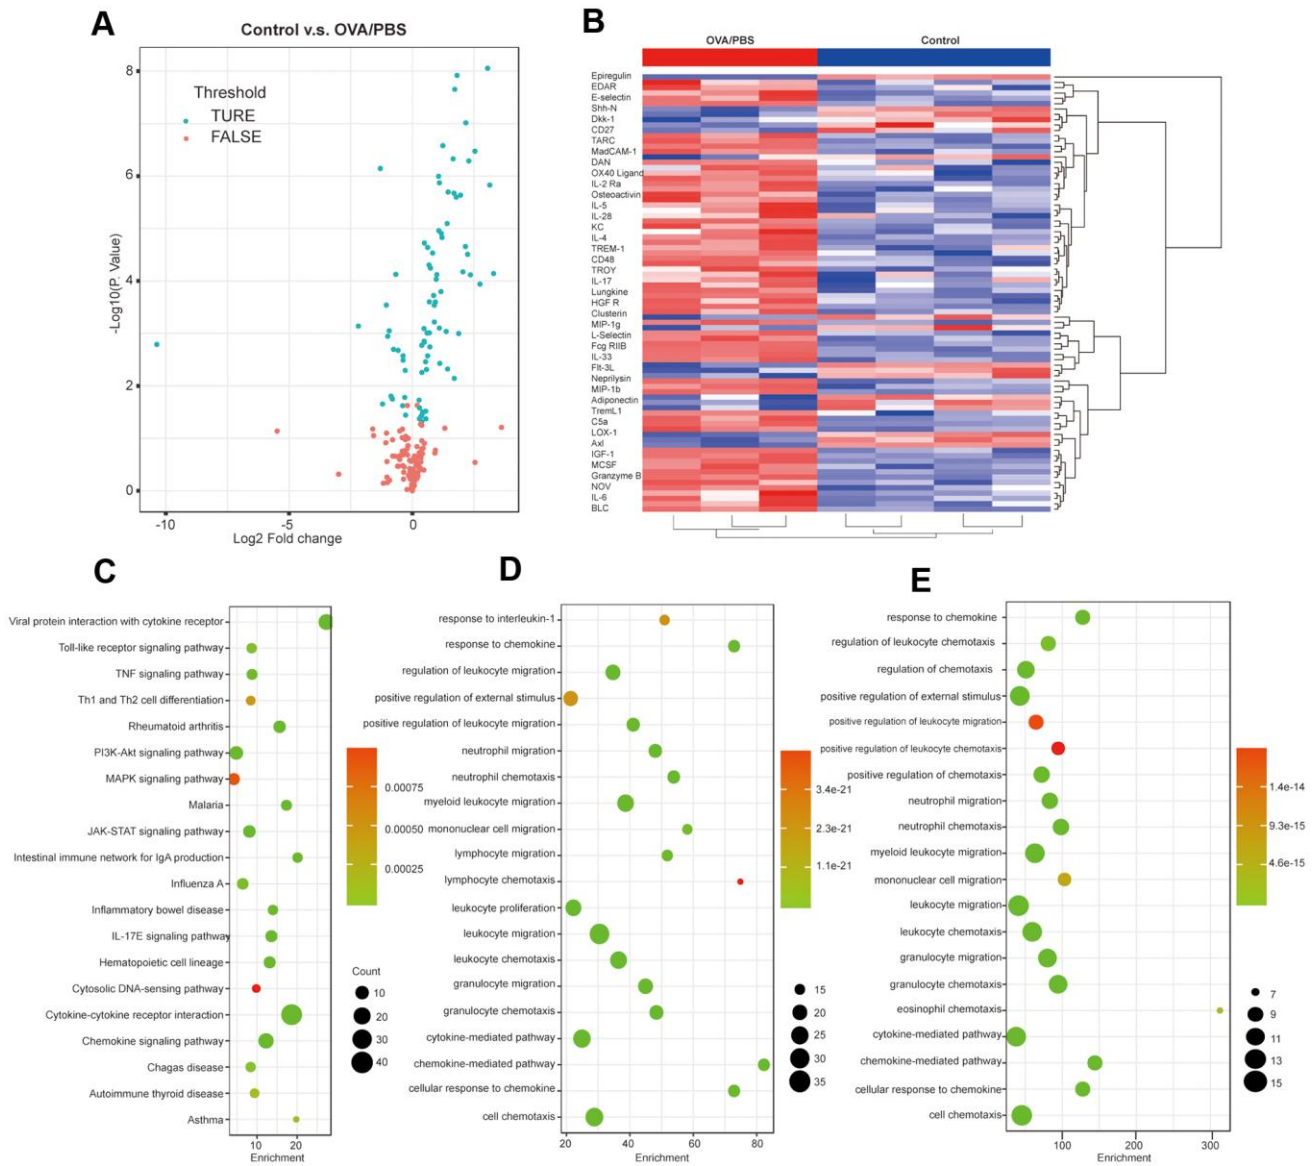

**Supplementary Figure 1.** (A) Volcano plot shows 82 differentially expressed proteins (DEPs) (blue dot) between Control and OVA/PBS, which are defined as those with  $\text{adj. p. Val} < 0.05$  and  $\text{foldchange} > 1.2$  or  $\text{foldchange} < 0.83$  (absolute  $\text{LogFC} > 0.263$ ). (B) Clustering heatmap. Red represents OVA/PBS group, blue represents Control group. (C) Protein function annotation KEGG pathway (Control v.s. OVA/PBS). (D) Protein function annotation Gene Ontology (GO)-BP (biological process) subtype (Control v.s. OVA/PBS). (E) Protein function annotation Gene Ontology (GO)-BP (biological process) subtype (OVA/PBS v.s. OVA/IL-37).
